# Supplementary material
Source: PubMed Central journal article supplement (PMC7097815)
Supplement: 41588_2007_BFng0607692_MOESM2_ESM.pdf [file 41588_2007_BFng0607692_MOESM2_ESM.pdf]

**Supplementary Table 1:** Allele, genotype and homo- or heterozygote frequencies of VNTR polymorphism in our study groups and Chan *et al.*.

| VNTR polymorphism       | Beijing populations, No. (%)            |                                      |                              |                                  | Tianjin populations, No. (%)           |                                     |                                  | Hong Kong populations, No. (%) <sup>b</sup> |                                          |                              |                                   |
|-------------------------|-----------------------------------------|--------------------------------------|------------------------------|----------------------------------|----------------------------------------|-------------------------------------|----------------------------------|---------------------------------------------|------------------------------------------|------------------------------|-----------------------------------|
|                         | Community patients<br>( <i>n</i> = 339) | Random controls<br>( <i>n</i> = 227) | HCW SARS<br>( <i>n</i> = 42) | HCW controls<br>( <i>n</i> = 40) | Community patients<br>( <i>n</i> = 60) | Random controls<br>( <i>n</i> = 85) | HCW controls<br>( <i>n</i> = 44) | Community patients<br>( <i>n</i> = 218)     | Outpatient controls<br>( <i>n</i> = 290) | HCW SARS<br>( <i>n</i> = 67) | HCW controls<br>( <i>n</i> = 172) |
| Genotypes <sup>a</sup>  |                                         |                                      |                              |                                  |                                        |                                     |                                  |                                             |                                          |                              |                                   |
| 5/5                     | 18 (5.3)                                | 6 (2.6)                              | 3 (7.1)                      | 3 (7.5)                          | 2 (3.3)                                | 5 (5.9)                             | 1 (2.3)                          | 8 (3.7)                                     | 14 (4.8)                                 | 1 (1.5)                      | 19 (11.0)                         |
| 5/9                     | 14 (4.1)                                | 10 (4.4)                             | 0 (0.0)                      | 4 (10.0)                         | 1 (1.7)                                | 5 (5.9)                             | 1 (2.3)                          | 7 (3.2)                                     | 8 (2.8)                                  | 2 (3.0)                      | 3 (1.7)                           |
| 6/5                     | 7 (2.1)                                 | 1 (0.4)                              | 0 (0.0)                      | 0 (0.0)                          | 0 (0.0)                                | 0 (0.0)                             | 2 (4.5)                          | 3 (1.4)                                     | 2 (0.7)                                  | 0 (0.0)                      | 7 (4.1)                           |
| 6/6                     | 1 (0.3)                                 | 0 (0.0)                              | 0 (0.0)                      | 0 (0.0)                          | 0 (0.0)                                | 0 (0.0)                             | 0 (0.0)                          | 1 (0.5)                                     | 0 (0.0)                                  | 0 (0.0)                      | 0 (0.0)                           |
| 6/9                     | 1 (0.3)                                 | 2 (0.9)                              | 0 (0.0)                      | 0 (0.0)                          | 2 (3.3)                                | 0 (0.0)                             | 0 (0.0)                          | 3 (1.4)                                     | 3 (1.0)                                  | 1 (1.5)                      | 1 (0.6)                           |
| 7/4                     | 1 (0.3)                                 | 0 (0.0)                              | 0 (0.0)                      | 0 (0.0)                          | 0 (0.0)                                | 0 (0.0)                             | 0 (0.0)                          | 0 (0.0)                                     | 0 (0.0)                                  | 0 (0.0)                      | 0 (0.0)                           |
| 7/5                     | 48 (14.2)                               | 42 (18.5)                            | 5 (11.9)                     | 10 (25.0)                        | 15 (25.0)                              | 19 (22.3)                           | 11 (25.0)                        | 49 (22.5)                                   | 50 (17.2)                                | 16 (23.9)                    | 25 (14.5)                         |
| 7/6                     | 15 (4.4)                                | 13 (5.7)                             | 1 (2.4)                      | 1 (2.5)                          | 3 (5.0)                                | 0 (0.0)                             | 3 (6.8)                          | 12 (5.5)                                    | 25 (8.6)                                 | 7 (10.4)                     | 6 (3.5)                           |
| 7/7                     | 175 (51.6)                              | 107 (47.1)                           | 24 (57.1)                    | 18 (45.0)                        | 25 (41.7)                              | 34 (40.0)                           | 14 (31.8)                        | 86 (39.4)                                   | 145 (50.0)                               | 27 (40.3)                    | 76 (44.2)                         |
| 7/8                     | 0 (0.0)                                 | 0 (0.0)                              | 0 (0.0)                      | 0 (0.0)                          | 0 (0.0)                                | 0 (0.0)                             | 0 (0.0)                          | 0 (0.0)                                     | 0 (0.0)                                  | 0 (0.0)                      | 1 (0.6)                           |
| 7/9                     | 53 (15.6)                               | 42 (18.5)                            | 8 (19.0)                     | 3 (7.5)                          | 12 (20.0)                              | 21 (24.7)                           | 10 (22.7)                        | 41 (18.8)                                   | 39 (13.4)                                | 12 (17.9)                    | 28 (16.3)                         |
| 9/9                     | 6 (1.8)                                 | 4 (1.8)                              | 1 (2.4)                      | 1 (2.5)                          | 0 (0.0)                                | 1 (1.2)                             | 2 (4.6)                          | 8 (3.7)                                     | 4 (1.4)                                  | 1 (1.5)                      | 6 (3.5)                           |
| Alleles <sup>a</sup>    |                                         |                                      |                              |                                  |                                        |                                     |                                  |                                             |                                          |                              |                                   |
| 4                       | 1 (0.1)                                 | 0 (0.0)                              | 0 (0.0)                      | 0 (0.0)                          | 0 (0.0)                                | 0 (0.0)                             | 0 (0.0)                          | 0 (0.0)                                     | 0 (0.0)                                  | 0 (0.0)                      | 0 (0.0)                           |
| 5                       | 105 (15.5)                              | 65 (14.3)                            | 11 (13.1)                    | 20 (25.0)                        | 20 (16.7)                              | 34 (20.0)                           | 16 (18.2)                        | 75 (17.2)                                   | 88 (15.2)                                | 20 (14.9)                    | 73 (21.2)                         |
| 6                       | 25 (3.7)                                | 16 (3.5)                             | 1 (1.2)                      | 1 (1.3)                          | 5 (4.2)                                | 0 (0.0)                             | 5 (5.7)                          | 20 (4.6)                                    | 30 (5.2)                                 | 8 (6.0)                      | 14 (4.1)                          |
| 7                       | 467 (68.9)                              | 311 (68.5)                           | 62 (73.8)                    | 50 (62.5)                        | 80 (66.6)                              | 108 (63.5)                          | 52 (59.1)                        | 274 (62.8)                                  | 404 (69.6)                               | 89 (66.4)                    | 212 (61.6)                        |
| 8                       | 0 (0.0)                                 | 0 (0.0)                              | 0 (0.0)                      | 0 (0.0)                          | 0 (0.0)                                | 0 (0.0)                             | 0 (0.0)                          | 0 (0.0)                                     | 0 (0.0)                                  | 0 (0.0)                      | 1 (0.3)                           |
| 9                       | 80 (11.8)                               | 62 (13.7)                            | 10 (11.9)                    | 9 (11.3)                         | 15 (12.5)                              | 28 (16.5)                           | 15 (17.0)                        | 67 (15.4)                                   | 58 (10.0)                                | 17 (12.7)                    | 44 (12.8)                         |
| Homo- or heterozygosity |                                         |                                      |                              |                                  |                                        |                                     |                                  |                                             |                                          |                              |                                   |
| Heterozygotes           | 139 (41.0)                              | 110 (48.5)                           | 14 (33.3)                    | 18 (45.0)                        | 33 (55.0)                              | 45 (52.9)                           | 27 (61.4)                        | 115 (52.8)                                  | 127 (43.8)                               | 38 (56.7)                    | 71 (41.3)                         |
| Homozygotes             | 200 (59.0)                              | 117 (51.5)                           | 28 (66.7)                    | 22 (55.0)                        | 27 (45.0)                              | 40 (47.1)                           | 17 (38.6)                        | 103 (47.2)                                  | 163 (56.2)                               | 29 (43.3)                    | 101 (58.7)                        |

All groups except the community patients in our Beijing populations were in Hardy-Weinberg equilibrium. Hardy-Weinberg Exact Test for our Beijing community patients, random controls, HCW SARS, HCW controls, and Tianjin community patients, HCW controls and random controls gave  $P = 0.0006$ ,  $P$

= 0.922,  $P = 0.055$ ,  $P = 0.257$ ,  $P = 0.397$ ,  $P = 0.610$  and  $P = 0.518$ , respectively.

**The comparison between groups within Beijing populations:** Between community patients and HCW patients, the differences in allele (CLUMP T1 = 2.033,  $P = 0.729$  by CLUMP), genotype (CLUMP T1 = 4.275,  $P = 0.934$  by CLUMP) and homo- or heterozygote ( $\chi^2 = 0.915$ ,  $P = 0.339$  by SPSS) frequencies are not significant. Similarly, between random controls and our HCW controls, the differences in allele (CLUMP T1 = 6.640,  $P = 0.0844$  by CLUMP), genotype (CLUMP T1 = 8.926,  $P = 0.629$  by CLUMP) and homo- or heterozygote ( $\chi^2 = 0.163$ ,  $P = 0.686$  by SPSS) frequencies are also not significant. Between community patients and random controls, the allele (CLUMP T1 = 1.690,  $P = 0.792$  by CLUMP) and genotype (CLUMP T1 = 10.357,  $P = 0.410$  by CLUMP) frequencies are similar. Similarly, the differences in allele (CLUMP T1 = 3.856,  $P = 0.278$  by CLUMP) and genotype (CLUMP T1 = 8.753,  $P = 0.188$  by CLUMP) frequencies between HCW patients and HCW controls are also not significant.

**The comparison between groups within Tianjin populations:** Between community patients and controls (containing the HCW controls and Random controls), the differences in allele (CLUMP T1 = 3.069,  $P = 0.689$  by CLUMP), genotype (CLUMP T1 = 9.257,  $P = 0.598$  by CLUMP) and homo- or heterozygote ( $\chi^2 = 0.011$ ,  $P = 0.916$  by SPSS) frequencies are not significant. Between random controls and HCW controls, the differences in allele (CLUMP T1 = 9.954,  $P = 0.0768$  by CLUMP), genotype (CLUMP T1 = 13.355,  $P = 0.271$  by CLUMP) and homo- or heterozygote ( $\chi^2 = 0.834$ ,  $P = 0.361$  by SPSS) frequencies are also not significant. Between community patients and random controls, the allele (CLUMP T1 = 8.358,  $P = 0.138$  by CLUMP) and genotype (CLUMP T1 = 10.245,  $P = 0.509$  by CLUMP) frequencies are similar. Similarly, the differences in allele (CLUMP T1 = 1.496,  $P = 0.913$  by CLUMP) and genotype (CLUMP T1 = 7.960,  $P = 0.717$  by CLUMP) frequencies between community patients and HCW controls are also not significant.

**The comparison between Beijing and Tianjin populations:** Between Beijing community patients and Tianjin community patients, there are no significant differences in allele (CLUMP T1 = 0.445,  $P = 0.994$  by CLUMP), genotype (CLUMP T1 = 15.570,  $P = 0.158$  by CLUMP) and homo- or heterozygote ( $\chi^2 = 3.261$ ,  $P = 0.071$  by SPSS) frequencies. Similarly, the comparison between Beijing HCW controls and Tianjin HCW controls is not significant for allele (CLUMP T1 = 4.279,  $P = 0.510$  by CLUMP), genotype (CLUMP T1 = 10.283,  $P = 0.505$  by CLUMP) and homo- or heterozygote ( $\chi^2 = 2.256$ ,  $P = 0.133$  by SPSS) frequencies. Between Beijing random controls and Tianjin random controls, the differences in allele (CLUMP T1 = 9.644,  $P = 0.086$  by CLUMP) and genotype (CLUMP T1 = 10.589,  $P = 0.478$  by CLUMP) and homo- or heterozygote ( $\chi^2 = 0.497$ ,  $P = 0.481$  by SPSS) frequencies were also not significant.

**The comparison between Hong Kong and Beijing populations:** Between Hong Kong outpatient controls and Beijing random controls, there are no

significant differences in allele (CLUMP T1 = 4.664,  $P = 0.198$  by CLUMP), genotype (CLUMP T1 = 6.705,  $P = 0.822$  by CLUMP) and homo- or heterozygote ( $\chi^2 = 1.116$ ,  $P = 0.291$  by SPSS) frequencies. Similarly, the comparison between Hong Kong HCW controls and Beijing HCW controls is not significant for allele (CLUMP T1 = 2.245,  $P = 0.691$  by CLUMP), genotype (CLUMP T1 = 13.246,  $P = 0.278$  by CLUMP) and homo- or heterozygote ( $\chi^2 = 0.184$ ,  $P = 0.668$  by SPSS) frequencies. Between Hong Kong community patients and Beijing community patients, the differences in allele (CLUMP T1 = 5.670,  $P = 0.225$  by CLUMP) and genotype (CLUMP T1 = 16.797,  $P = 0.114$  by CLUMP) frequencies were not significant; however, the differences in homo- or heterozygote ( $\chi^2 = 7.384$ ,  $P = 0.0066$  by SPSS) frequencies differed significantly. Between Hong Kong HCW patients and Beijing HCW patients, the differences in allele (CLUMP T1 = 3.412,  $P = 0.333$  by CLUMP) and genotype (CLUMP T1 = 10.032,  $P = 0.528$  by CLUMP) frequencies were not significant; however, the differences in homo- or heterozygote ( $\chi^2 = 5.658$ ,  $P = 0.017$  by SPSS) frequencies differed significantly.

**The comparison between Hong Kong and Tianjin populations:** Between Hong Kong outpatient controls and Tianjin random controls, there are no significant differences in genotype (CLUMP T1 = 18.325,  $P = 0.0747$  by CLUMP) and homo- or heterozygote ( $\chi^2 = 2.216$ ,  $P = 0.137$  by SPSS) frequencies; however, the difference in allele (CLUMP T1 = 16.199,  $P = 0.00635$  by CLUMP) frequency differed significantly. The comparison between Hong Kong HCW controls and Tianjin HCW controls is not significant for allele (CLUMP T1 = 1.987,  $P = 0.851$  by CLUMP) and genotype (CLUMP T1 = 8.951,  $P = 0.626$  by CLUMP) frequencies; however, the differences in homo- or heterozygote ( $\chi^2 = 5.702$ ,  $P = 0.0169$  by SPSS) frequencies differed significantly. Between Hong Kong community patients and Tianjin community patients, the differences in allele (CLUMP T1 = 0.793,  $P = 0.977$  by CLUMP), genotype (CLUMP T1 = 4.955,  $P = 0.933$  by CLUMP) and homo- or heterozygote ( $\chi^2 = 0.095$ ,  $P = 0.757$  by SPSS) frequencies were not significant. Similarly, between Hong Kong HCW patients and Tianjin community patients, the differences in allele (CLUMP T1 = 0.527,  $P = 0.991$  by CLUMP), genotype (CLUMP T1 = 3.333,  $P = 0.986$  by CLUMP) and homo- or heterozygote ( $\chi^2 = 0.038$ ,  $P = 0.846$  by SPSS) frequencies were not significant.

<sup>a</sup>Numbers of the tandem repeats at exon 4.

<sup>b</sup>The data of Hong Kong populations are derived from Chan *et al.*<sup>1</sup>.

## Reference

1. Chan, V.S. *et al. Nat. Genet.* **38**, 38-46 (2006).
