# Supplementary material
Source: PubMed Central journal article supplement (PMC7097815)
Supplement: 41588_2007_BFng0607692_MOESM3_ESM.pdf [file 41588_2007_BFng0607692_MOESM3_ESM.pdf]

**Supplementary Table 2:** Primers used in VNTR polymorphism genotyping and sequencing

| Names          | Sequences (5' → 3')*               |
|----------------|------------------------------------|
| L-SIGN-forward | 68731-CTTTTCTTCTTGGCCCAGTGT-68751  |
| L-SIGN-reverse | 69403-CTCAGGCAGGGTT GGTAAGTC-69383 |

\*The numbers are based on the sequence of AC008812.7.
